# Supplementary material for: Synthesis, one/two-photon optical and electrochemical properties and the photopolymerization-sensitizing effect of anthracene-based dyes: influence of the donor groups
Source: Royal Society of Chemistry journal article supplement (doi:10.1039/c8nj06520a), 2019-01-01
Supplement: c8nj06520a1.pdf [file c8nj06520a1.pdf]

## Supporting Information

### **Synthesis, one/two-photon optical and electrochemical properties, and photopolymerization-sensitizing effect of anthracene-based dyes: influence of the donor groups**

Tanlong Xue,<sup>ac</sup> Di Zhao,<sup>a</sup> Tingting Hao,<sup>a</sup> Xiuyan Li,<sup>b</sup> Tao Wang <sup>\*a</sup> and Jun Nie <sup>ac</sup>

<sup>a</sup> *State Key Laboratory of Chemical Resource Engineering, College of Science, Beijing  
University of Chemical Technology, Beijing 100029, China*

<sup>b</sup> *College of Materials Science and Engineering, Beijing Institute of Fashion Technology,  
Beijing 100029, China.*

<sup>c</sup> *College of Materials Science and Engineering, Beijing University of Chemical Technology,  
Beijing 100029, China.*

*\*Corresponding E-mail address: wangtwj2000@163.com*

# Content

**Fig. S1–S8.** The  $^1\text{H}$  NMR and  $^{13}\text{C}$  NMR spectra of ANDs.

**Table S1** Theoretical vertical transition energies, oscillator strength ( $f_{\text{os}}$ ), involved molecular orbitals (MOs) and corresponding contribution.

**Fig. S9.** Molecular orbitals involved in different transition states.

**Fig. S10.** Comparison of experimental UV-vis spectra and theoretical vertical transition energy.

**Fig. S11.** Uv-vis absorption spectra of ANDs in different solvent.

**Fig. S12.** Fluorescence emission spectra of ANDs in different solvent.

**Table S2** One-photon optical properties of ANDs in different solvent.

**Fig. S13.** Energy minimum structure of ANDs (ground state).

**Table S3** The TPA cross-sections (TPACS) of ANDs at wavelengths ranging from 780 nm to 880 nm.

**Table S4.** The electrochemical data of Fc and sub-units in ANDs.

**Fig. S14.** The  $E_{\text{onset ox}}$  and  $E_{\text{onset red}}$  obtained according to the literature method (*vs.* SCE).

**Fig. S15.** Photopolymerization profiles of HDDA in the presence of ANDs/ONI and AN/ONI under violet LED.

**Fig. S16.** Uv-vis spectra of THF solution with different ANDs concentration.

**Fig. S17.** Molar extinction coefficient at specific wavelength calculated by using the Lambert-Beer law.

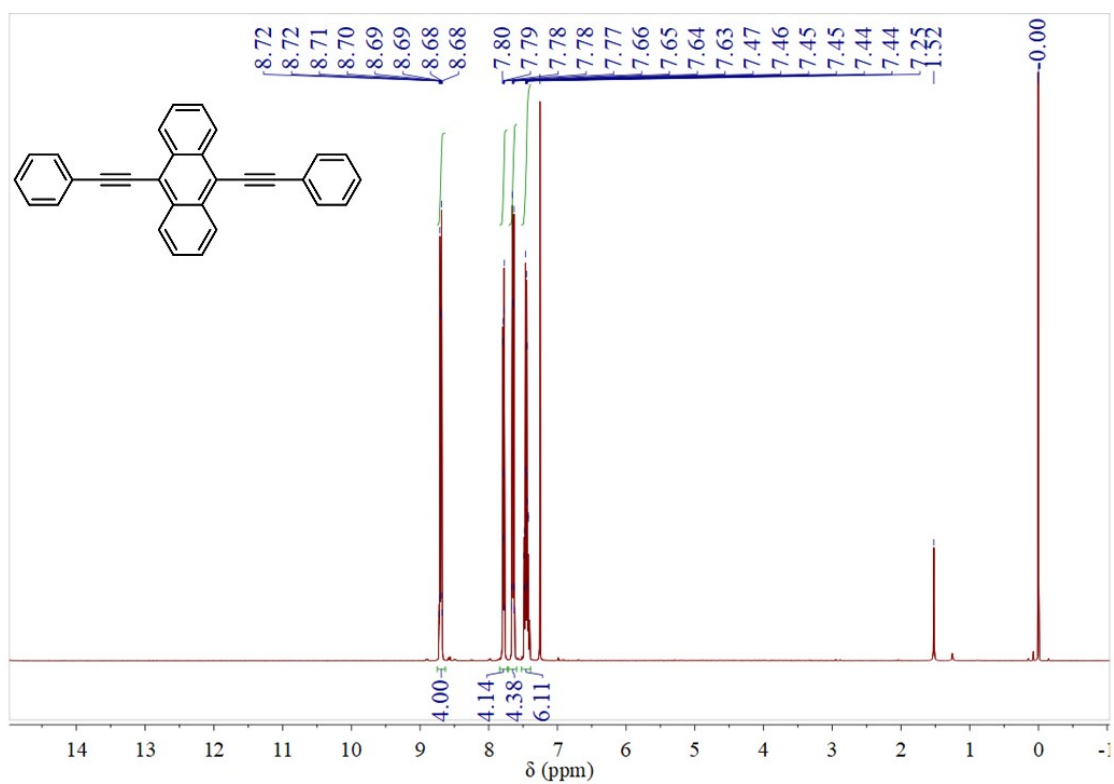

**Fig. S1.** The  $^1\text{H}$  NMR spectrum of A1.

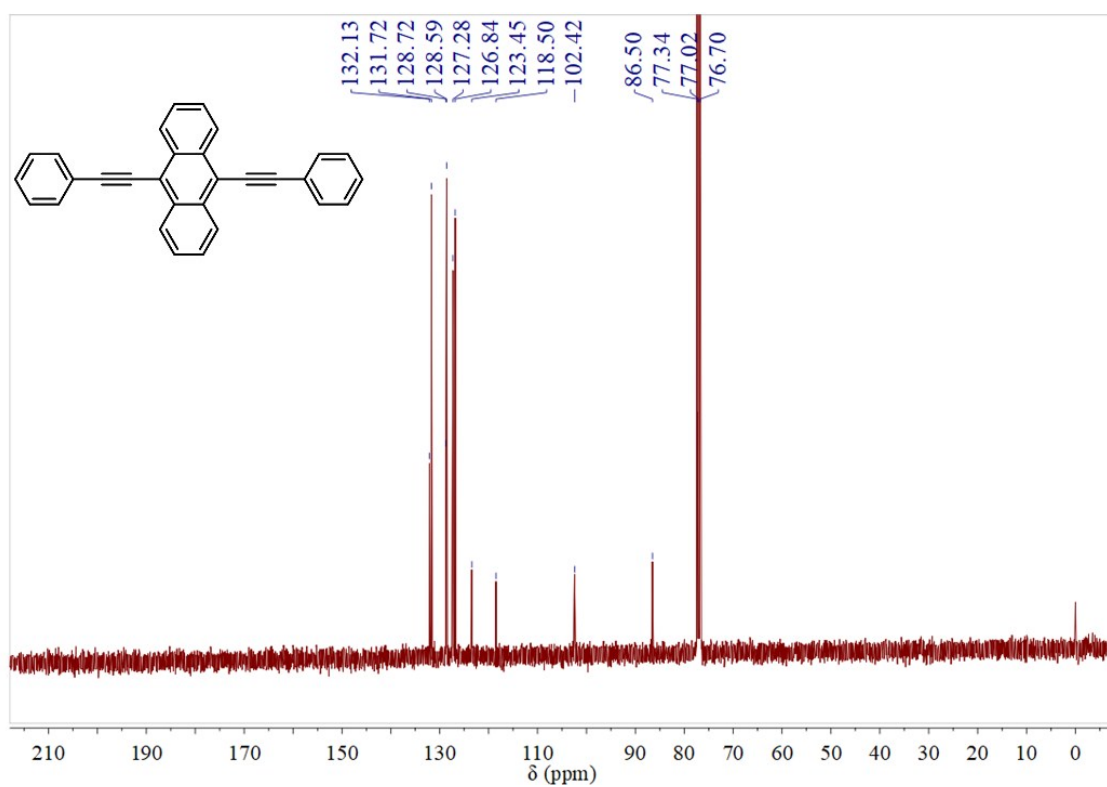

**Fig. S2.** The  $^{13}\text{C}$  NMR spectrum of A1.

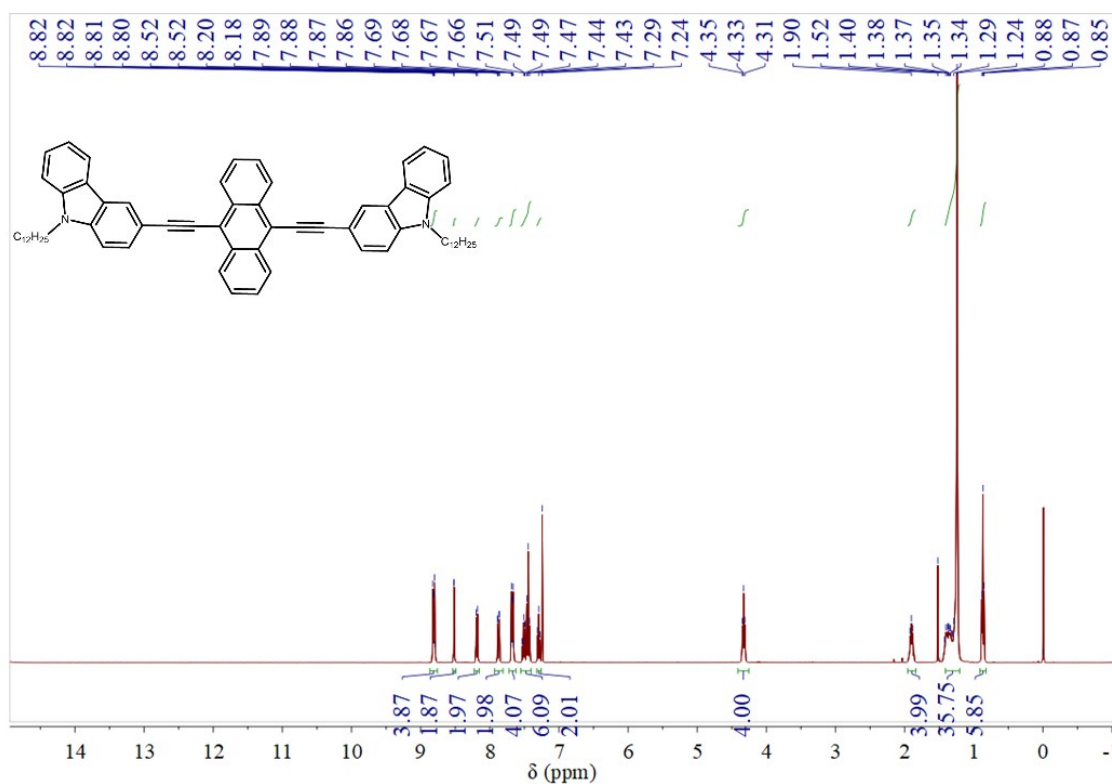

**Fig. S3.** The <sup>1</sup>H NMR spectrum of A2.

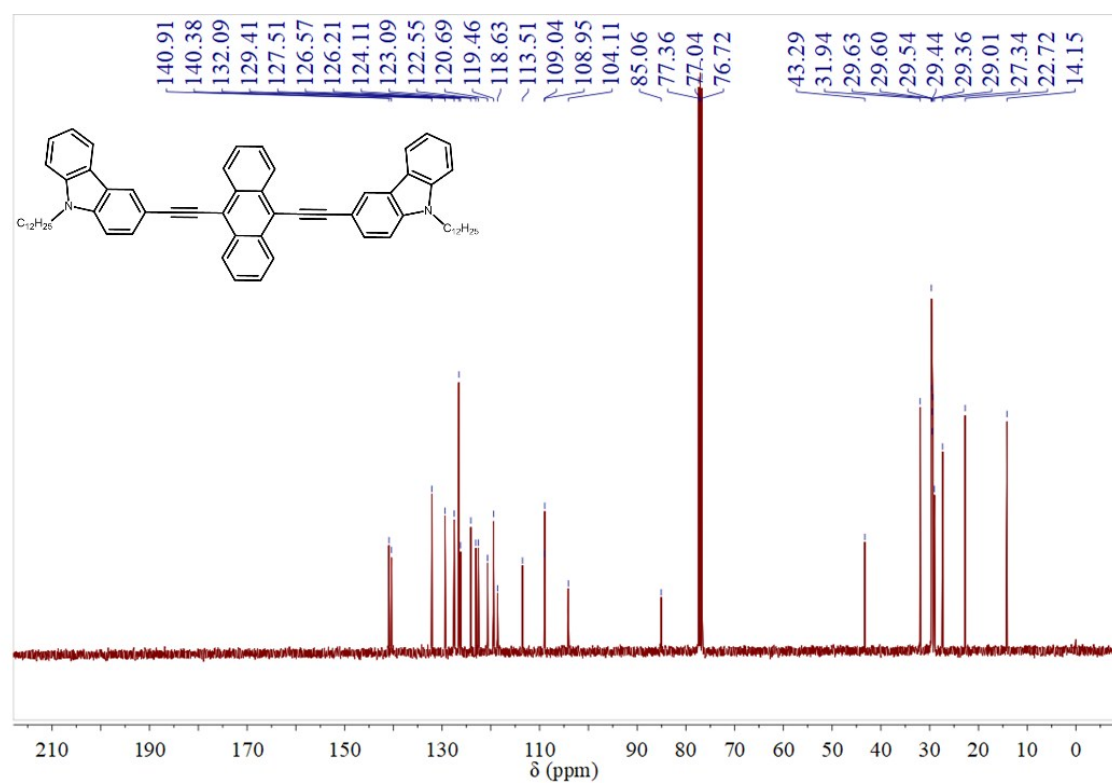

**Fig. S4.** The <sup>13</sup>C NMR spectrum of A2.

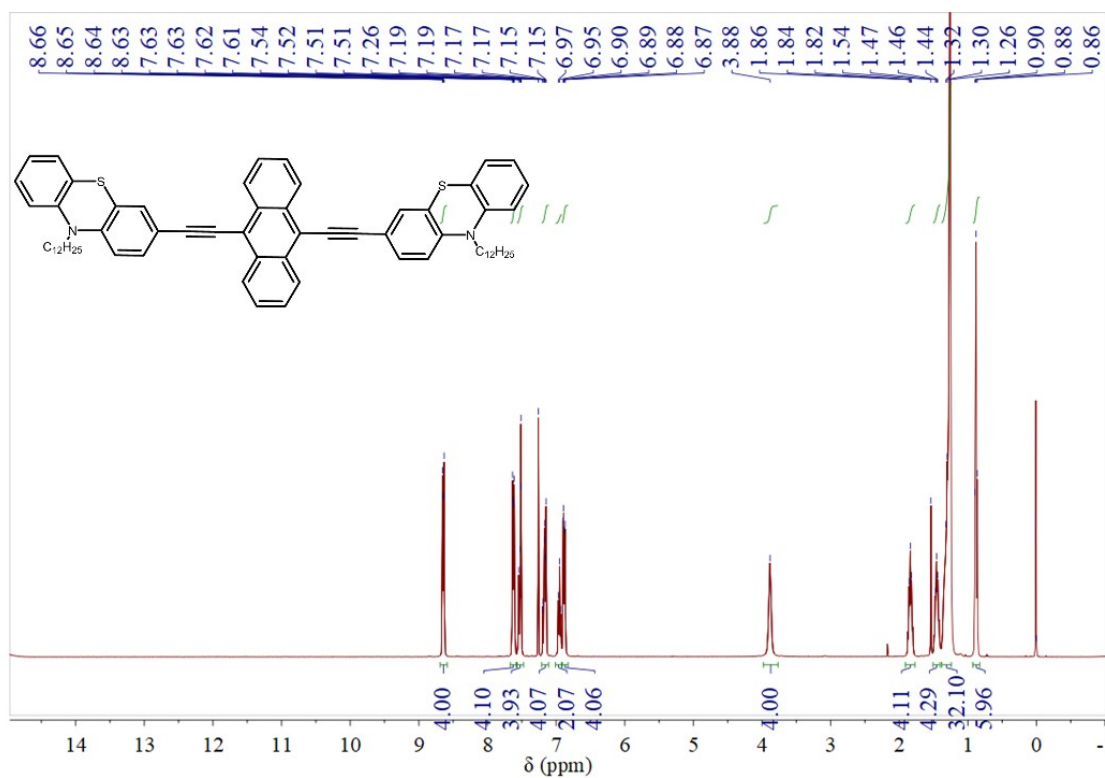

**Fig. S5.** The <sup>1</sup>H NMR spectrum of A3.

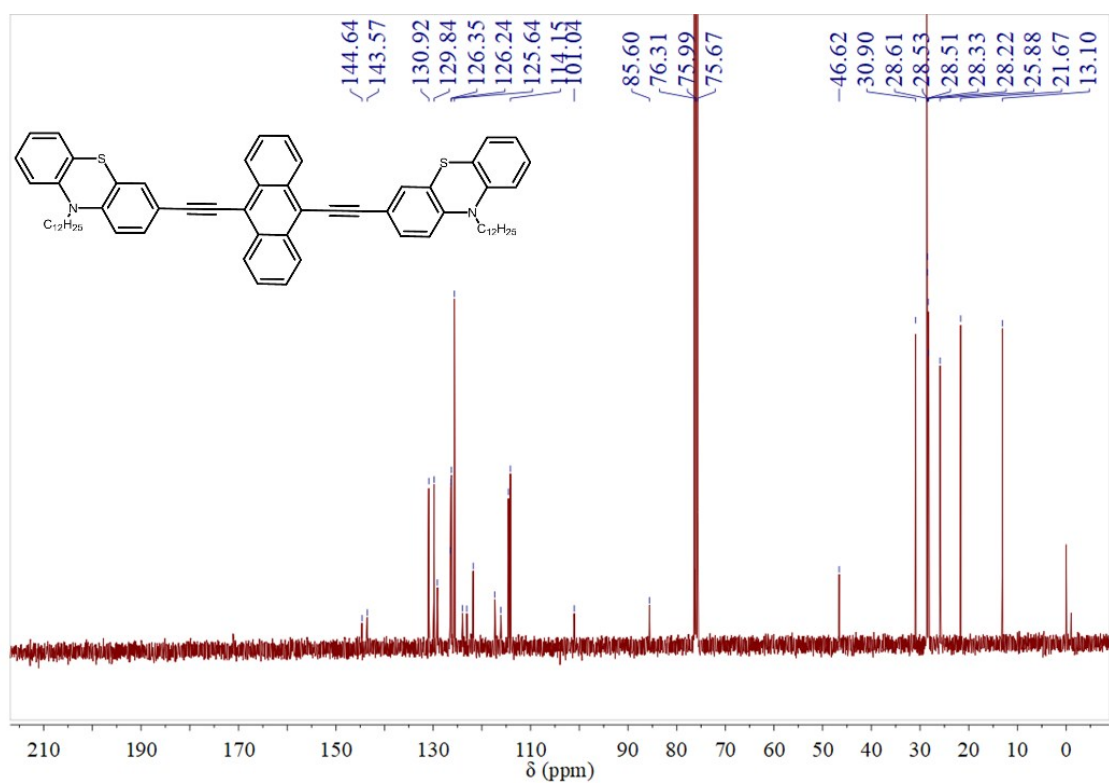

**Fig. S6.** The <sup>13</sup>C NMR spectrum of A3.

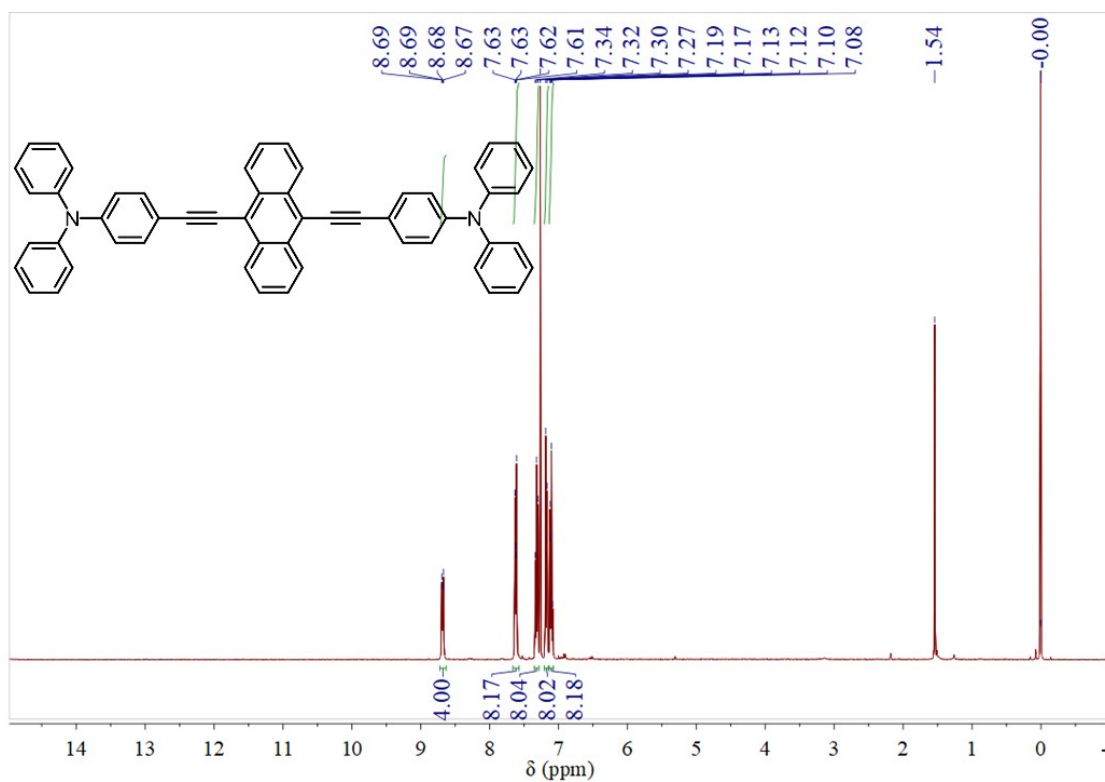

**Fig. S7.** The <sup>1</sup>H NMR spectrum of A4.

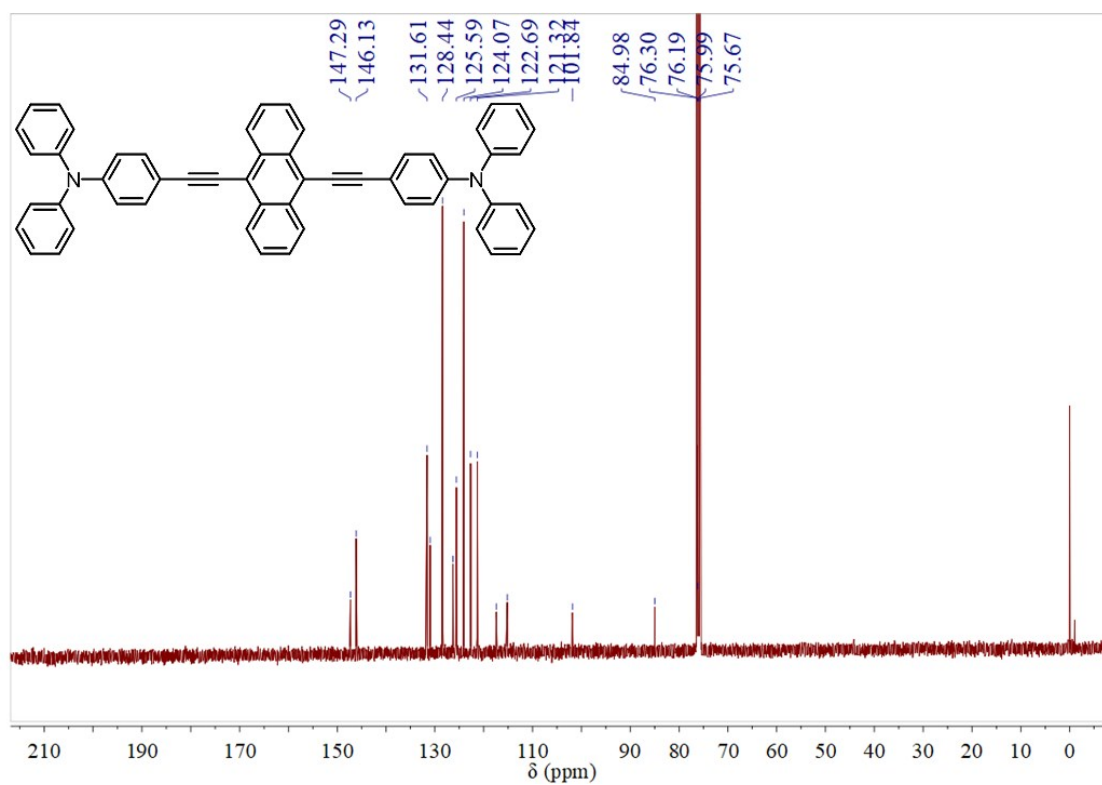

**Fig. S8.** The <sup>13</sup>C NMR spectrum of A4.

**Table S1** Theoretical vertical transition energies, oscillator strength ( $f_{os}$ ), involved molecular orbitals (MOs) and corresponding contribution

| Molecular | Excited states | $\Delta E$<br>(eV) | $\lambda(\text{nm})$ | $f_{os}$ | Involved MOs | Contribution |
|-----------|----------------|--------------------|----------------------|----------|--------------|--------------|
| A1        | 1              |                    |                      |          | HOMO→LUMO    | 99%          |
|           |                | 2.7499             | 450.86               | 1.0349   |              |              |
|           | 3              | 4.2654             | 290.67               | 0.6369   | HOMO-2→LUMO  | 74%          |
|           | 10             | 4.7953             | 258.55               | 1.4308   | HOMO-3→LUMO  | 41%          |
| A2        |                |                    |                      |          | HOMO→LUMO+3  | 57%          |
|           | 1              | 2.6267             | 472.02               | 1.5213   | HOMO→LUMO    | 96%          |
|           | 4              | 3.9148             | 316.71               | 0.4299   | HOMO-2→LUMO  | 61%          |
|           | 7              | 4.3783             | 283.18               | 0.5820   | HOMO→LUMO+3  | 81%          |
| A3        | 1              | 2.6288             | 471.64               | 1.1028   | HOMO→LUMO    | 92%          |
|           | 3              | 3.6707             | 337.77               | 0.1896   | HOMO-2→LUMO  | 72%          |
|           | 7              | 4.3628             | 284.18               | 0.5662   | HOMO-4→LUMO  | 35%          |
| A4        | 1              | 2.5938             | 478                  | 1.8626   | HOMO→LUMO    | 91%          |
|           | 3              | 3.6762             | 337.26               | 0.3961   | HOMO-2→LUMO  | 83%          |
|           | 5              | 4.2061             | 294.77               | 0.6384   | HOMO→LUMO+2  | 66%          |

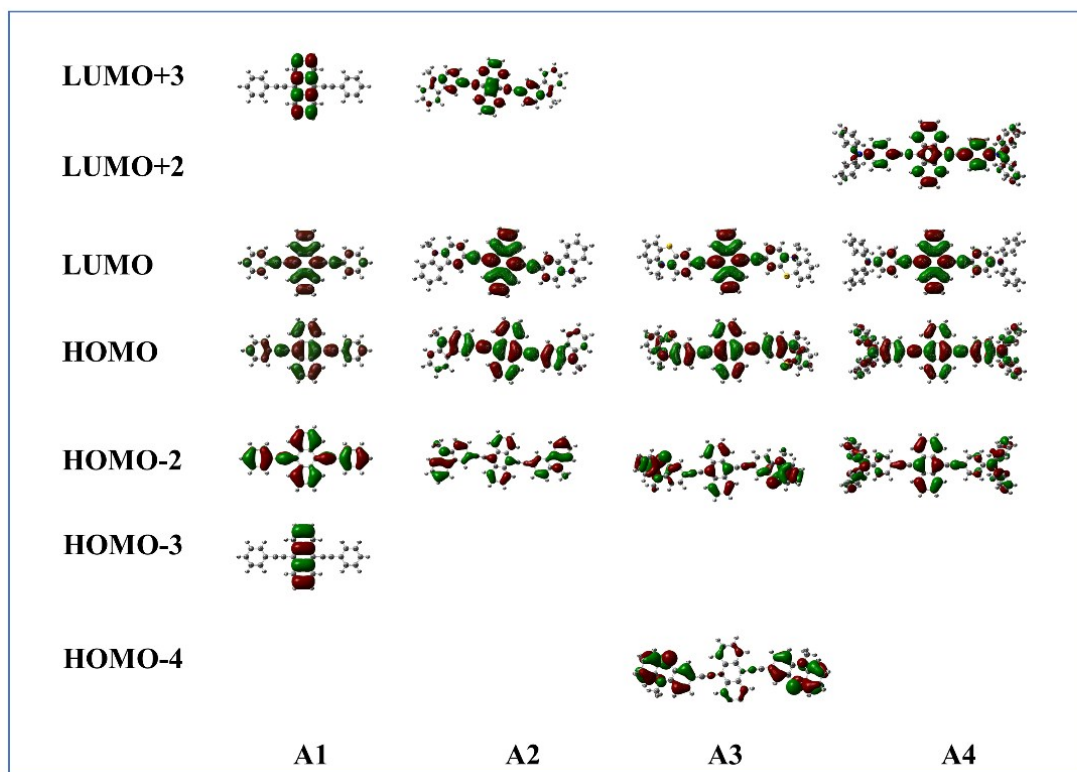

**Fig. S9.** Molecular orbitals of ANDs involved in different excited states.

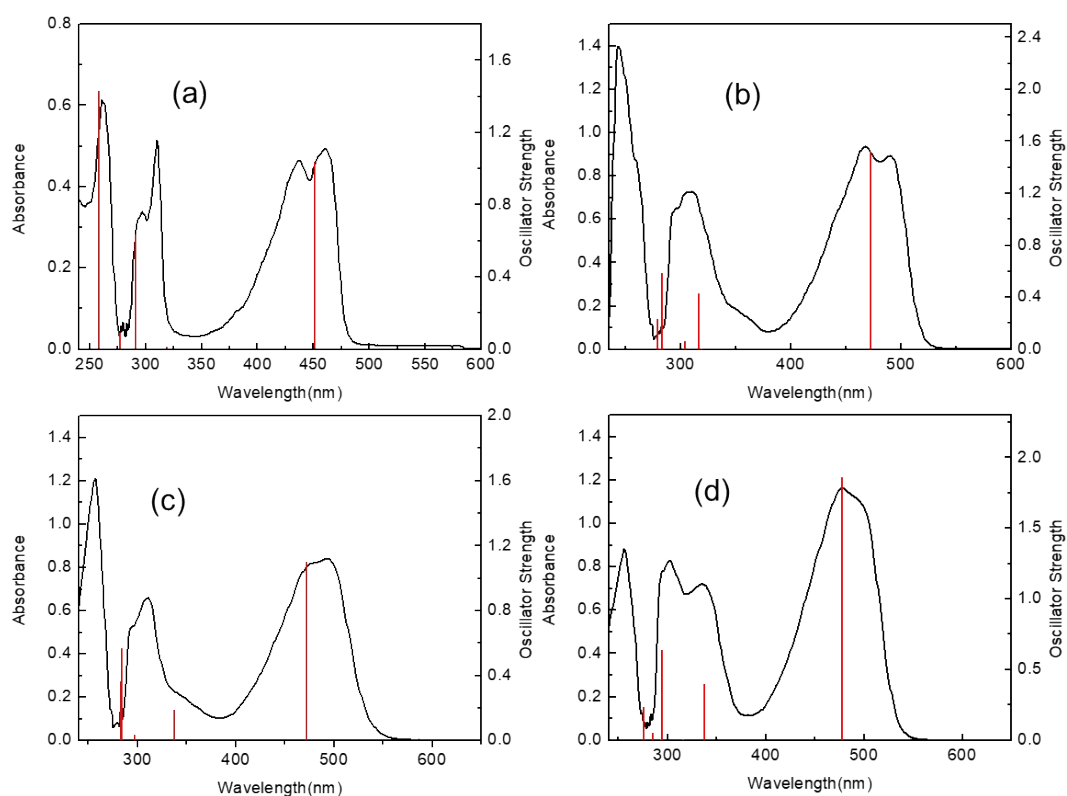

**Fig. S10.** Comparison of experimental UV-vis spectra and theoretical vertical transition energy. (a) A1, (b) A2, (c) A3, (d) A4. (The experimental spectra in black, calculated transition energies in red vertical lines).

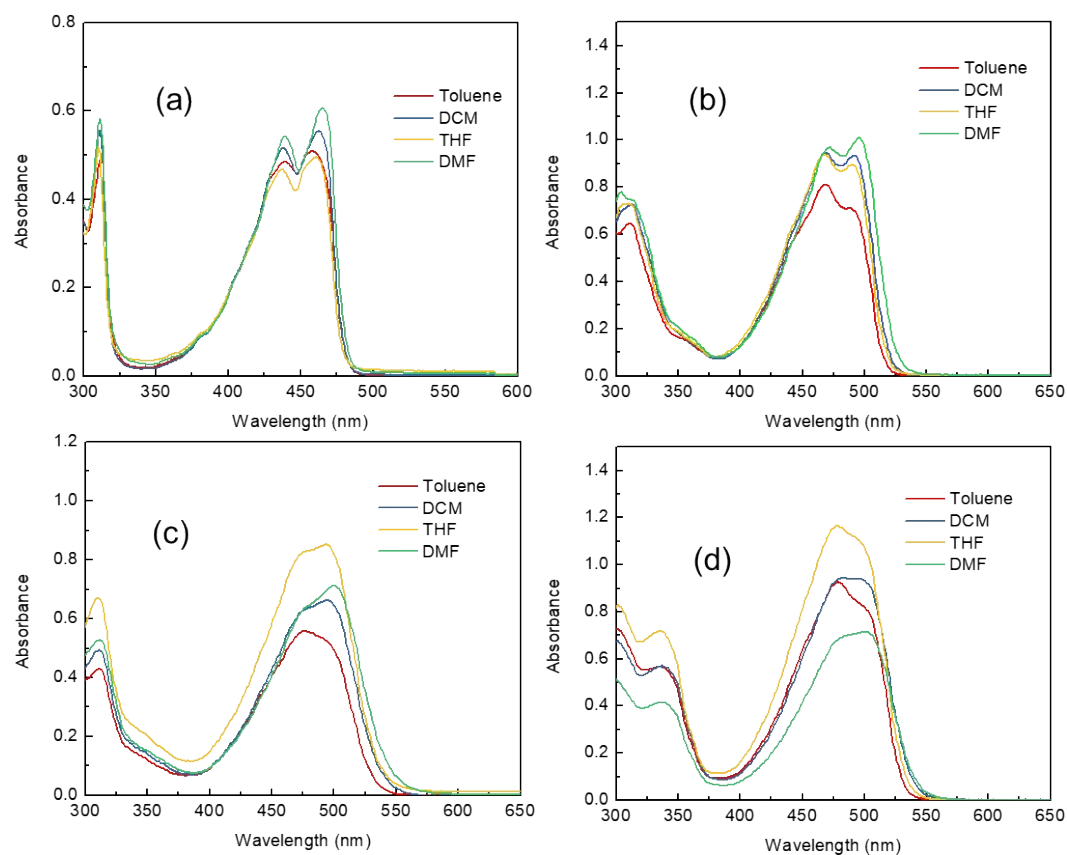

**Fig. S11.** Uv-vis absorption spectra of ANDs in different slovent ( $2.0 \times 10^{-5}$  M). (a) A1, (b) A2, (c)



A3, (d) A4.

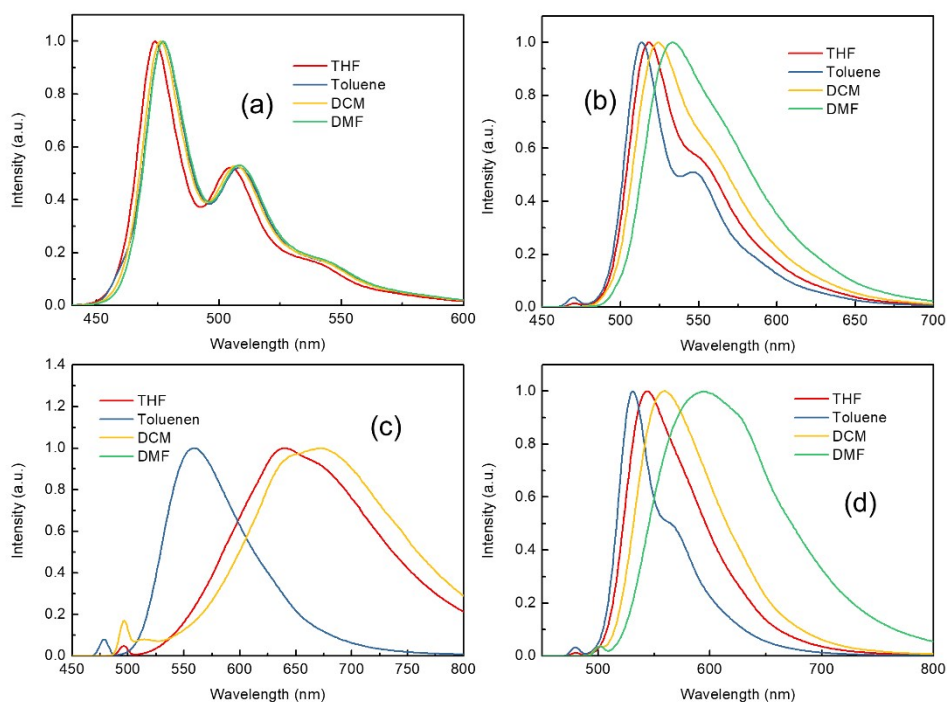

**Fig. S12.** Fluorescence emission spectra of ANDs in different solvent ( $2 \times 10^{-5}$  M). (a) A1, (b) A2, (c) A3, (d) A4.

**Table S2** One-photon optical properties of ANDs in different solvent

|    | Solvent | $\lambda_{\max 1}$<br>(nm) | $\lambda_{\max 2}$<br>(nm) | $\lambda_{\text{ex}}$<br>(nm) | $\lambda_{\text{em}}$<br>(nm) | Stocks Shift<br>(nm) |
|----|---------|----------------------------|----------------------------|-------------------------------|-------------------------------|----------------------|
| A1 | Toluene | 459                        | 435                        | 459                           | 477                           | 18                   |
|    | DCM     | 462                        | 438                        | 462                           | 476                           | 14                   |
|    | THF     | 461                        | 437                        | 461                           | 474                           | 13                   |
|    | DMF     | 465                        | 311                        | 465                           | 477                           | 12                   |
| A2 | Toluene | 489                        | 469                        | 489                           | 514                           | 25                   |
|    | DCM     | 491                        | 469                        | 491                           | 524                           | 33                   |
|    | THF     | 490                        | 468                        | 490                           | 518                           | 28                   |
|    | DMF     | 495                        | 472                        | 495                           | 533                           | 38                   |
| A3 | Toluene | 476                        | 312                        | 476                           | 559                           | 83                   |
|    | DCM     | 496                        | 311                        | 496                           | 671                           | 175                  |
|    | THF     | 494                        | 311                        | 494                           | 638                           | 144                  |
|    | DMF     | 500                        | 311                        | 500                           | N <sup>a</sup>                | N <sup>a</sup>       |
| A4 | Toluene | 479                        | 337                        | 479                           | 531                           | 52                   |
|    | DCM     | 485                        | 337                        | 485                           | 559                           | 74                   |
|    | THF     | 478                        | 336                        | 478                           | 544                           | 66                   |
|    | DMF     | 501                        | 336                        | 501                           | 594                           | 93                   |

<sup>a</sup> No fluorescence signal was detected in DMF.

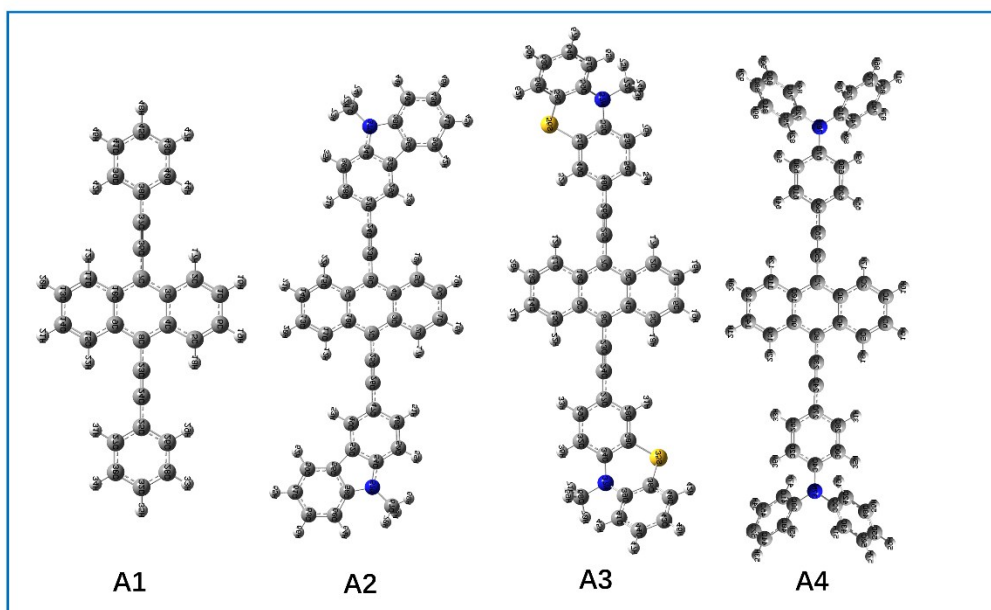

**Fig. S13.** Energy minimum structure of ANDs (ground states).

**Table S3.** The TPA cross-sections (TPACS) of ANDs at wavelengths ranging from 780 nm to 880 nm

| Wavelength (nm) | $\sigma_{\text{TPA}}$ (GM)* |     |     |      |
|-----------------|-----------------------------|-----|-----|------|
|                 | A1                          | A2  | A3  | A4   |
| 880             | 37                          | 66  | 330 | 293  |
| 860             | 25                          | 53  | 323 | 481  |
| 840             | 25                          | 117 | 506 | 617  |
| 820             | 90                          | 512 | 616 | 1263 |
| 800             | 12                          | 566 | 300 | 713  |
| 780             | 0                           | 644 | 232 | 463  |

\*The uncertainty of TPACS values may deviates from 15% because that a slope of 1.763 is too small to give the accurate uncertainty.

**Table S4.** The electrochemical data of Fc and sub-units in ANDs.

|     | $E_{\text{pa1}}$ <sup>a</sup><br>(V) | $E_{\text{pc1}}$ <sup>a</sup><br>(V) | $E_{1/2}$ <sup>b</sup><br>(V) | $i_{\text{pa1}}$ <sup>c</sup><br>(uA) | $i_{\text{pc1}}$ <sup>c</sup><br>(uA) |
|-----|--------------------------------------|--------------------------------------|-------------------------------|---------------------------------------|---------------------------------------|
| Fc  | 0.25                                 | 0.13                                 | 0.19                          | 13.5                                  | -11.5                                 |
| AN  | 1.31                                 | -                                    | -                             | 24.1                                  | -                                     |
| CZ  | 1.20                                 | 0.75                                 | 0.98                          | 19.9                                  | -4.0                                  |
| PTZ | 0.70                                 | 0.60                                 | 0.65                          | 9.8                                   | -7.34                                 |
| TPE | 0.99                                 | 0.86                                 | 0.93                          | 16.9                                  | -8.3                                  |

<sup>a</sup>  $E_{\text{pa1}}$  and  $E_{\text{pc1}}$  correspond to the peak potential at first anodic peak and corresponding cathodic peak, Redox potentials are reported in V (vs. SCE). <sup>b</sup> Half-wave potential,  $E_{1/2} = (E_{\text{pa1}} + E_{\text{pc1}})/2$ . <sup>c</sup> The peak current of first anodic peak and corresponding cathodic peak.

\* The  $E_{1/2}$  potential of Fc in DCM is reported as 0.38V (vs. SCE) in literature. As such, the potentials vs SCE in this work were calculated by  $E$  (vs  $\text{Ag}^+/\text{Ag}$ ) + 0.19V.

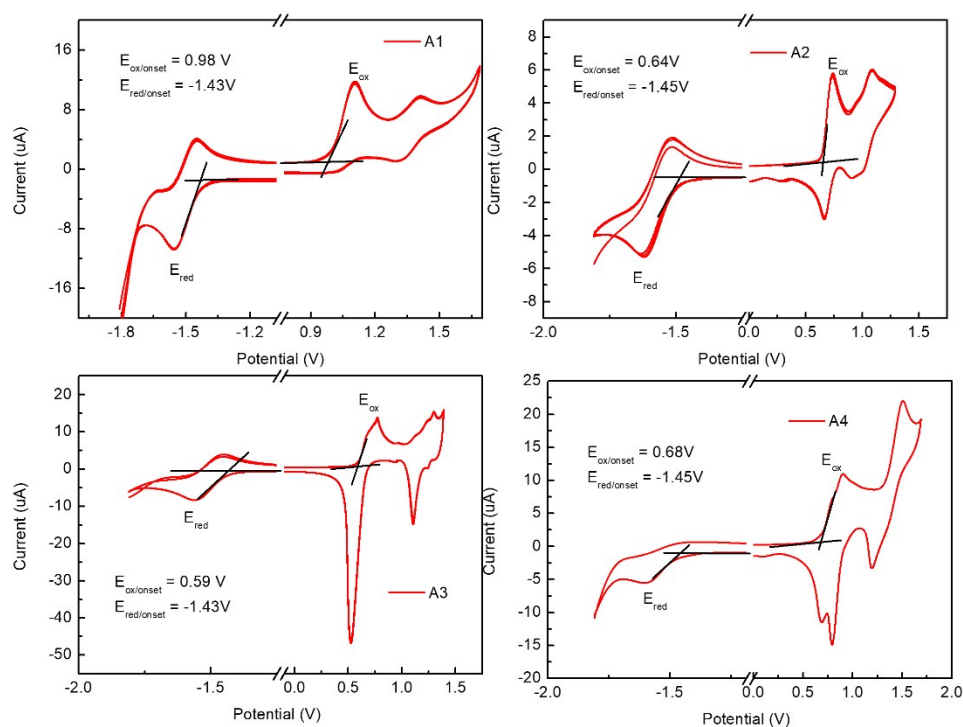

**Fig. S14.** The  $E_{\text{onset ox}}$  and  $E_{\text{onset red}}$  obtained according to the literature method (vs. SCE).

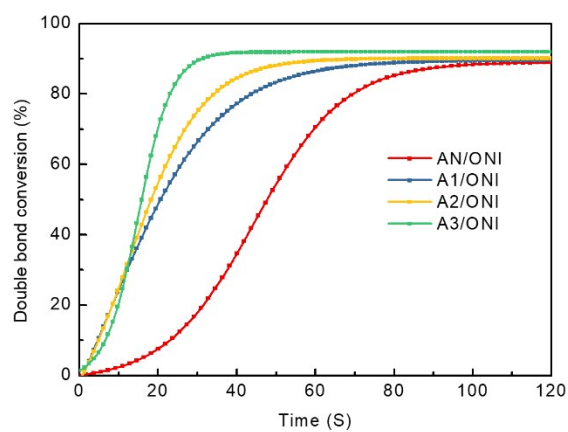

**Fig. S15.** Photopolymerization profiles of HDDA in the presence of ANDs/ONI (ONI: 2.0 wt%; ANDs: 0.2 wt%) and AN/ONI (ONI: 2.0 wt%; AN: 0.2 wt%) under violet LED.

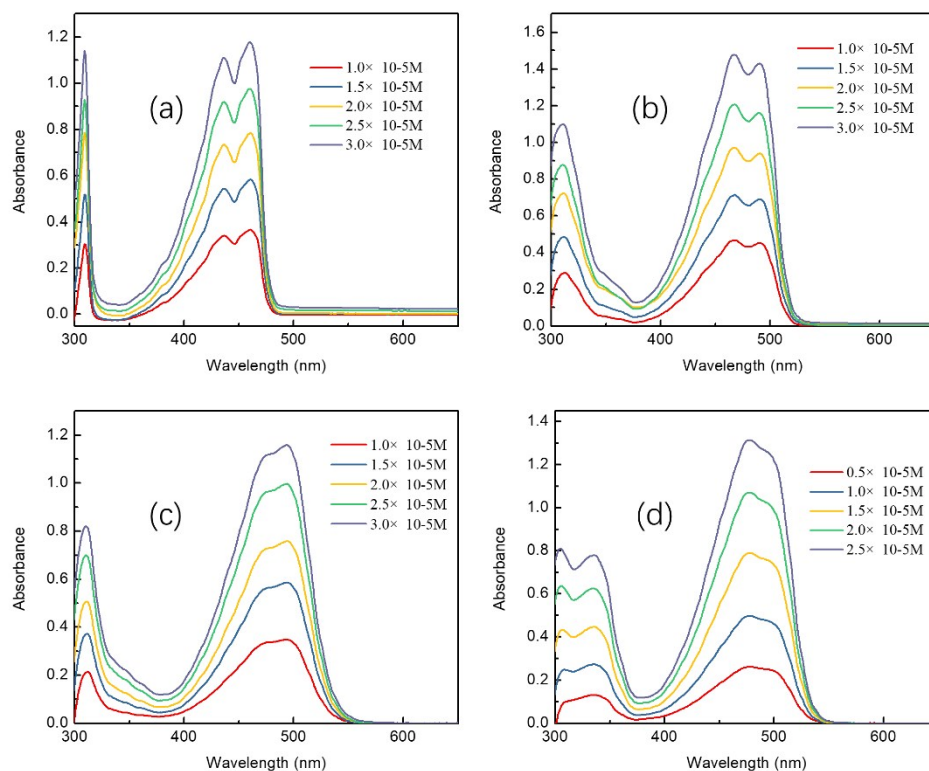

**Fig. S16.** Uv-vis spectra of THF solution with different ANDs concentration. (a) A1; (b) A2; (c) A3; (d) A4.

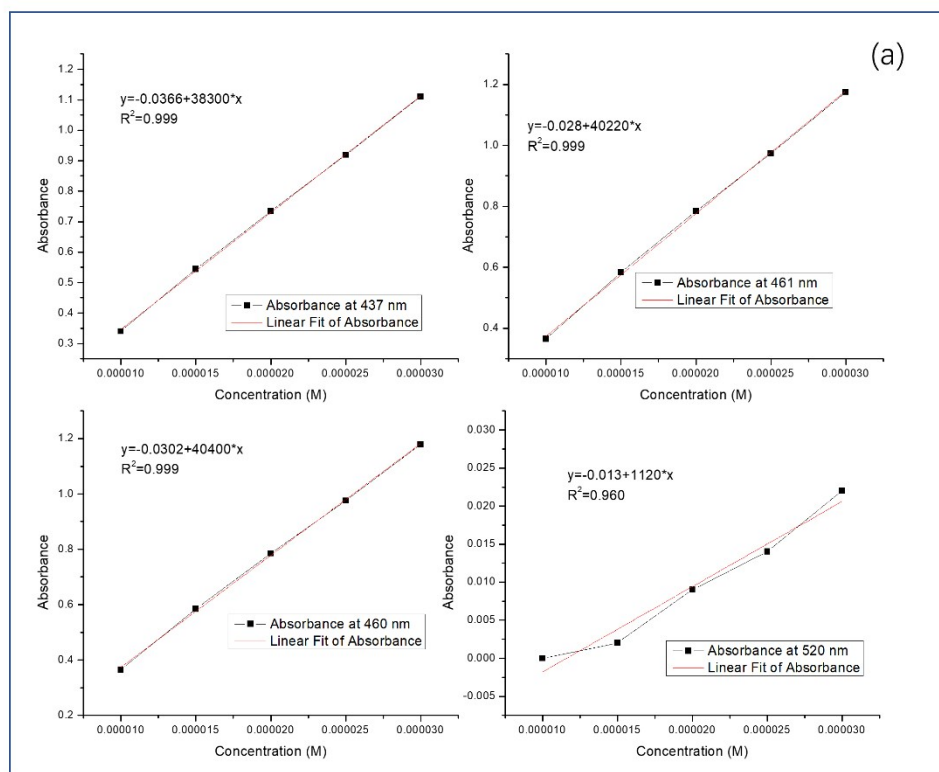

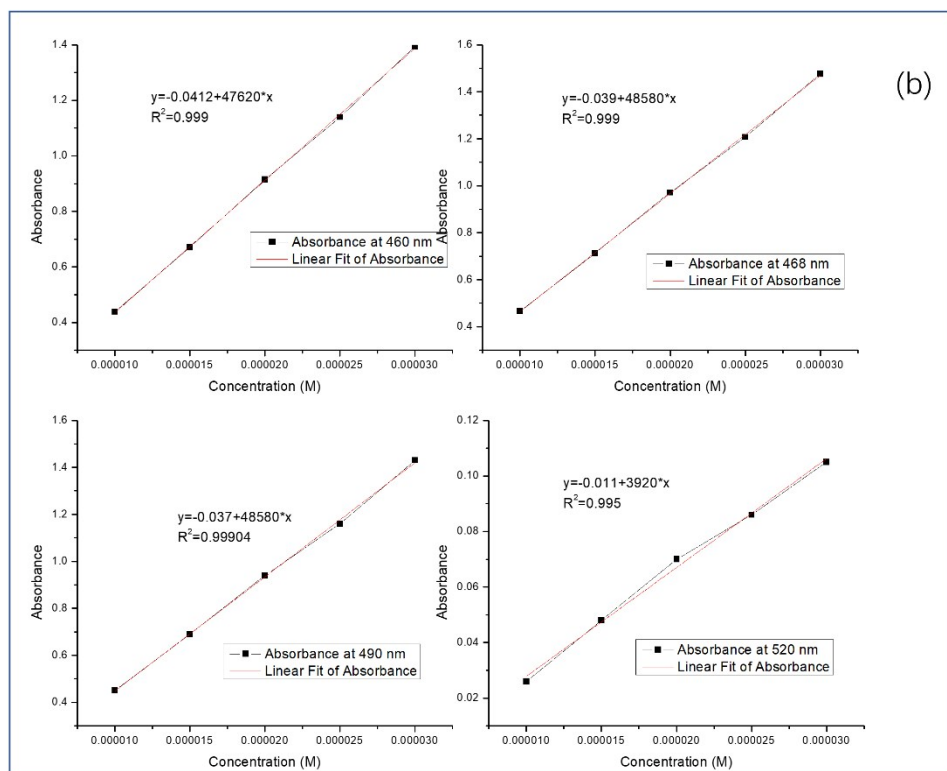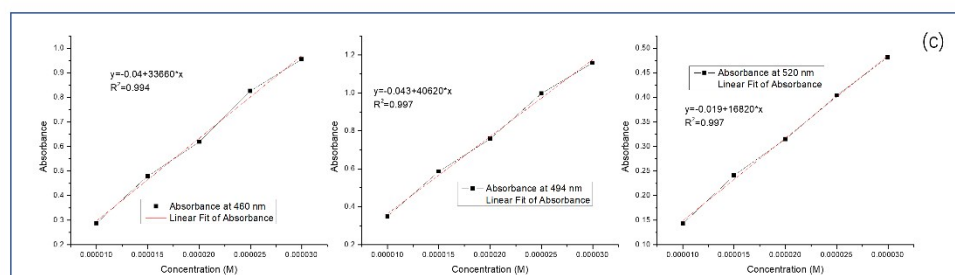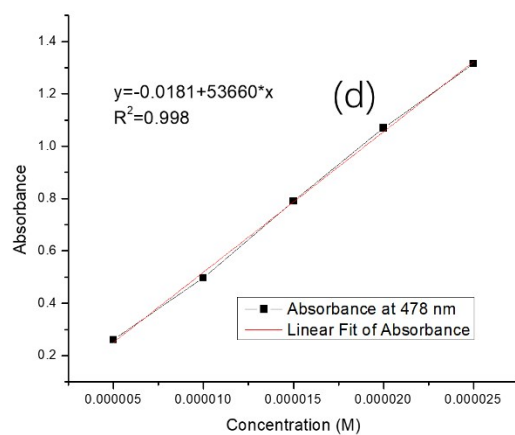

**Fig. S17.** Molar extinction coefficient at specific wavelength calculated by using the Lambert-Beer law. (a) A1; (b) A2; (c) A3; (d) A4.
